# Supplementary material
Source: publisher figshare collection journal article supplement (https://acs.figshare.com/ndownloader/files/4422793)
Supplement: Supplementary file 1 [file 4422793]

 
data_ks612 
 
_audit_creation_method            SHELXL-97 
_chemical_name_systematic 
; 
 ? 
; 
_chemical_name_common             ? 
_chemical_melting_point           ? 
_chemical_formula_moiety          ? 
_chemical_formula_sum 
 'C60 H90 O2 P2 Pd' 
_chemical_formula_weight          1011.66 
 
loop_ 
 _atom_type_symbol 
 _atom_type_description 
 _atom_type_scat_dispersion_real 
 _atom_type_scat_dispersion_imag 
 _atom_type_scat_source 
 'C'  'C'   0.0033   0.0016 
 'International Tables Vol C Tables 4.2.6.8 and 6.1.1.4' 
 'H'  'H'   0.0000   0.0000 
 'International Tables Vol C Tables 4.2.6.8 and 6.1.1.4' 
 'O'  'O'   0.0106   0.0060 
 'International Tables Vol C Tables 4.2.6.8 and 6.1.1.4' 
 'P'  'P'   0.1023   0.0942 
 'International Tables Vol C Tables 4.2.6.8 and 6.1.1.4' 
 'Pd'  'Pd'  -0.9988   1.0072 
 'International Tables Vol C Tables 4.2.6.8 and 6.1.1.4' 
 
_symmetry_cell_setting            monoclinic 
_symmetry_space_group_name_H-M    C2/c 
 
loop_ 
 _symmetry_equiv_pos_as_xyz 
 'x, y, z' 
 '-x, y, -z+1/2' 
 'x+1/2, y+1/2, z' 
 '-x+1/2, y+1/2, -z+1/2' 
 '-x, -y, -z' 
 'x, -y, z-1/2' 
 '-x+1/2, -y+1/2, -z' 
 'x+1/2, -y+1/2, z-1/2' 
 
_cell_length_a                    15.864(3) 
_cell_length_b                    14.489(3) 
_cell_length_c                    22.849(5) 
_cell_angle_alpha                 90.00 
_cell_angle_beta                  95.02(3) 
_cell_angle_gamma                 90.00 
_cell_volume                      5231.7(18) 
_cell_formula_units_Z             4 
_cell_measurement_temperature     293(2) 
_cell_measurement_reflns_used     4676 
_cell_measurement_theta_min       2.01 
_cell_measurement_theta_max       27.1 
 
_exptl_crystal_description        prism 
_exptl_crystal_colour             green 
_exptl_crystal_size_max           0.2 
_exptl_crystal_size_mid           0.2
_exptl_crystal_size_min           0.1
_exptl_crystal_density_meas       ? 
_exptl_crystal_density_diffrn     1.284 
_exptl_crystal_density_method     'not measured' 
_exptl_crystal_F_000              2168 
_exptl_absorpt_coefficient_mu     0.458 
_exptl_absorpt_correction_type    none 
_exptl_absorpt_correction_T_min   ? 
_exptl_absorpt_correction_T_max   ? 
_exptl_absorpt_process_details    ? 
 
_exptl_special_details 
; 
 ? 
; 
 
_diffrn_ambient_temperature       293(2) 
_diffrn_radiation_wavelength      0.71073 
_diffrn_radiation_type            MoK\a 
_diffrn_radiation_source          'fine-focus sealed tube' 
_diffrn_radiation_monochromator   graphite 
_diffrn_measurement_device_type   'STOE-IPDS II' 
_diffrn_measurement_method        ? 
_diffrn_detector_area_resol_mean  ? 
_diffrn_standards_number          ? 
_diffrn_standards_interval_count  ? 
_diffrn_standards_interval_time   ? 
_diffrn_standards_decay_%         ? 
_diffrn_reflns_number             33863 
_diffrn_reflns_av_R_equivalents   0.0688 
_diffrn_reflns_av_sigmaI/netI     0.0662 
_diffrn_reflns_limit_h_min        -19 
_diffrn_reflns_limit_h_max        19 
_diffrn_reflns_limit_k_min        -17 
_diffrn_reflns_limit_k_max        17 
_diffrn_reflns_limit_l_min        -28 
_diffrn_reflns_limit_l_max        28 
_diffrn_reflns_theta_min          1.79 
_diffrn_reflns_theta_max          26.00 
_reflns_number_total              5150 
_reflns_number_gt                 3768 
_reflns_threshold_expression      >2sigma(I) 
 
_computing_data_collection        STOE-X-AREA 
_computing_cell_refinement        ? 
_computing_data_reduction         ? 
_computing_structure_solution     'SHELXS-97 (Sheldrick, 1990)' 
_computing_structure_refinement   'SHELXL-97 (Sheldrick, 1997)' 
_computing_molecular_graphics     XP 
_computing_publication_material   ? 
 
_refine_special_details 
; 
 Refinement of F^2^ against ALL reflections.  The weighted R-factor wR and 
 goodness of fit S are based on F^2^, conventional R-factors R are based 
 on F, with F set to zero for negative F^2^. The threshold expression of 
 F^2^ > 2sigma(F^2^) is used only for calculating R-factors(gt) etc. and is 
 not relevant to the choice of reflections for refinement.  R-factors based 
 on F^2^ are statistically about twice as large as those based on F, and R- 
 factors based on ALL data will be even larger. 
; 
 
_refine_ls_structure_factor_coef  Fsqd  
_refine_ls_matrix_type            full 
_refine_ls_weighting_scheme       calc  
_refine_ls_weighting_details 
 'calc w=1/[\s^2^(Fo^2^)+(0.0328P)^2^+0.0000P] where P=(Fo^2^+2Fc^2^)/3' 
_atom_sites_solution_primary      direct 
_atom_sites_solution_secondary    difmap 
_atom_sites_solution_hydrogens    geom 
_refine_ls_hydrogen_treatment     constr 
_refine_ls_extinction_method      none 
_refine_ls_extinction_coef        ? 
_refine_ls_number_reflns          5150 
_refine_ls_number_parameters      265 
_refine_ls_number_restraints      0 
_refine_ls_R_factor_all           0.0572 
_refine_ls_R_factor_gt            0.0361 
_refine_ls_wR_factor_ref          0.0742 
_refine_ls_wR_factor_gt           0.0712 
_refine_ls_goodness_of_fit_ref    0.933 
_refine_ls_restrained_S_all       0.933 
_refine_ls_shift/su_max           0.001 
_refine_ls_shift/su_mean          0.000 
 
loop_ 
 _atom_site_label 
 _atom_site_type_symbol 
 _atom_site_fract_x 
 _atom_site_fract_y 
 _atom_site_fract_z 
 _atom_site_U_iso_or_equiv 
 _atom_site_adp_type 
 _atom_site_occupancy 
 _atom_site_symmetry_multiplicity 
 _atom_site_calc_flag 
 _atom_site_refinement_flags 
 _atom_site_disorder_assembly 
 _atom_site_disorder_group 
C25A C 0.0669(7) 0.9067(4) 0.0450(5) 0.078(3) Uiso 0.481(11) 1 d PG A 1 
H25A H 0.0474 0.9642 0.0318 0.094 Uiso 0.481(11) 1 calc PR A 1 
C26A C 0.0529(4) 0.8773(6) 0.1013(5) 0.073(3) Uiso 0.481(11) 1 d PG A 1 
H26A H 0.0241 0.9151 0.1257 0.088 Uiso 0.481(11) 1 calc PR A 1 
C27A C 0.0821(7) 0.7914(7) 0.1211(2) 0.061(2) Uiso 0.481(11) 1 d PG A 1 
H27A H 0.0727 0.7717 0.1587 0.074 Uiso 0.481(11) 1 calc PR A 1 
C28A C 0.1252(6) 0.7349(4) 0.0847(6) 0.080(3) Uiso 0.481(11) 1 d PG A 1 
H28A H 0.1447 0.6774 0.0979 0.096 Uiso 0.481(11) 1 calc PR A 1 
C29A C 0.1392(6) 0.7642(8) 0.0284(5) 0.097(4) Uiso 0.481(11) 1 d PG A 1 
H29A H 0.1681 0.7264 0.0040 0.116 Uiso 0.481(11) 1 calc PR A 1 
C30A C 0.1100(8) 0.8502(9) 0.0086(2) 0.088(3) Uiso 0.481(11) 1 d PG A 1 
H30A H 0.1194 0.8698 -0.0290 0.106 Uiso 0.481(11) 1 calc PR A 1 
C25B C 0.0840(5) 0.8862(6) 0.0192(5) 0.080(3) Uiso 0.519(11) 1 d PG A 2 
H25B H 0.0741 0.9316 -0.0094 0.097 Uiso 0.519(11) 1 calc PR A 2 
C26B C 0.0473(4) 0.8933(5) 0.0721(6) 0.089(3) Uiso 0.519(11) 1 d PG A 2 
H26B H 0.0129 0.9434 0.0789 0.107 Uiso 0.519(11) 1 calc PR A 2 
C27B C 0.0621(5) 0.8254(10) 0.1147(3) 0.078(3) Uiso 0.519(11) 1 d PG A 2 
H27B H 0.0376 0.8302 0.1501 0.094 Uiso 0.519(11) 1 calc PR A 2 
C28B C 0.1136(6) 0.7505(7) 0.1045(4) 0.081(3) Uiso 0.519(11) 1 d PG A 2 
H28B H 0.1235 0.7051 0.1331 0.097 Uiso 0.519(11) 1 calc PR A 2 
C29B C 0.1503(4) 0.7435(4) 0.0517(6) 0.089(3) Uiso 0.519(11) 1 d PG A 2 
H29B H 0.1847 0.6933 0.0448 0.107 Uiso 0.519(11) 1 calc PR A 2 
C30B C 0.1355(5) 0.8113(9) 0.0090(2) 0.082(3) Uiso 0.519(11) 1 d PG A 2 
H30B H 0.1601 0.8066 -0.0264 0.098 Uiso 0.519(11) 1 calc PR A 2 
C1 C 0.40264(18) 0.85815(18) 0.18863(12) 0.0341(7) Uani 1 1 d . . . 
H1A H 0.4109 0.8266 0.2261 0.041 Uiso 1 1 calc R . . 
H1B H 0.3502 0.8354 0.1688 0.041 Uiso 1 1 calc R . . 
C2 C 0.47446(17) 0.83125(18) 0.15235(13) 0.0359(7) Uani 1 1 d . . . 
H2A H 0.4615 0.8525 0.1123 0.043 Uiso 1 1 calc R . . 
H2B H 0.5259 0.8619 0.1681 0.043 Uiso 1 1 calc R . . 
C3 C 0.4895(2) 0.7280(2) 0.15187(15) 0.0499(8) Uani 1 1 d . . . 
H3A H 0.4384 0.6976 0.1354 0.060 Uiso 1 1 calc R . . 
H3B H 0.5010 0.7067 0.1920 0.060 Uiso 1 1 calc R . . 
C4 C 0.5625(2) 0.6999(3) 0.11688(19) 0.0701(11) Uani 1 1 d . . . 
H4A H 0.5691 0.6341 0.1184 0.105 Uiso 1 1 calc R . . 
H4B H 0.6136 0.7288 0.1334 0.105 Uiso 1 1 calc R . . 
H4C H 0.5509 0.7191 0.0768 0.105 Uiso 1 1 calc R . . 
C5 C 0.36107(17) 1.03473(17) 0.12717(11) 0.0298(6) Uani 1 1 d . . . 
C6 C 0.30884(18) 1.12423(18) 0.13077(12) 0.0337(6) Uani 1 1 d . . .
H6A H 0.2556 1.1102 0.1466 0.040 Uiso 1 1 calc R . . 
H6B H 0.3395 1.1675 0.1571 0.040 Uiso 1 1 calc R . . 
C7 C 0.29147(19) 1.1685(2) 0.07023(13) 0.0408(7) Uani 1 1 d . . . 
H7A H 0.2577 1.2245 0.0737 0.049 Uiso 1 1 calc R . . 
C8 C 0.3749(2) 1.1936(2) 0.04631(14) 0.0449(8) Uani 1 1 d . . . 
H8A H 0.4054 1.2374 0.0724 0.054 Uiso 1 1 calc R . . 
H8B H 0.3643 1.2222 0.0080 0.054 Uiso 1 1 calc R . . 
C9 C 0.42760(19) 1.1065(2) 0.04131(13) 0.0410(7) Uani 1 1 d . . . 
H9A H 0.4814 1.1226 0.0258 0.049 Uiso 1 1 calc R . . 
C10 C 0.3794(2) 1.0387(2) -0.00057(13) 0.0464(8) Uani 1 1 d . . . 
H10A H 0.3689 1.0665 -0.0391 0.056 Uiso 1 1 calc R . . 
H10B H 0.4129 0.9834 -0.0044 0.056 Uiso 1 1 calc R . . 
C11 C 0.29533(19) 1.0139(2) 0.02344(12) 0.0396(7) Uani 1 1 d . . . 
H11A H 0.2643 0.9707 -0.0035 0.048 Uiso 1 1 calc R . . 
C12 C 0.31205(18) 0.96838(19) 0.08390(12) 0.0349(7) Uani 1 1 d . . . 
H12A H 0.3446 0.9123 0.0803 0.042 Uiso 1 1 calc R . . 
H12B H 0.2587 0.9519 0.0988 0.042 Uiso 1 1 calc R . . 
C13 C 0.2428(2) 1.1010(2) 0.02859(13) 0.0446(8) Uani 1 1 d . . . 
H13A H 0.1892 1.0857 0.0435 0.054 Uiso 1 1 calc R . . 
H13B H 0.2314 1.1292 -0.0098 0.054 Uiso 1 1 calc R . . 
C14 C 0.44530(16) 1.0623(2) 0.10206(12) 0.0355(6) Uani 1 1 d . . . 
H14A H 0.4758 1.1055 0.1285 0.043 Uiso 1 1 calc R . . 
H14B H 0.4803 1.0079 0.0990 0.043 Uiso 1 1 calc R . . 
C15 C 0.29358(16) 0.98411(18) 0.24724(11) 0.0293(6) Uani 1 1 d . . . 
C16 C 0.21155(17) 0.9465(2) 0.21471(13) 0.0397(7) Uani 1 1 d . . . 
H16A H 0.1957 0.9847 0.1806 0.048 Uiso 1 1 calc R . . 
H16B H 0.2211 0.8843 0.2012 0.048 Uiso 1 1 calc R . . 
C17 C 0.13946(19) 0.9461(2) 0.25537(14) 0.0501(9) Uani 1 1 d . . . 
H17A H 0.0879 0.9224 0.2338 0.060 Uiso 1 1 calc R . . 
C18 C 0.1627(2) 0.8849(2) 0.30813(16) 0.0579(9) Uani 1 1 d . . . 
H18A H 0.1728 0.8224 0.2952 0.070 Uiso 1 1 calc R . . 
H18B H 0.1165 0.8834 0.3332 0.070 Uiso 1 1 calc R . . 
C19 C 0.2420(2) 0.9223(3) 0.34231(13) 0.0508(8) Uani 1 1 d . . . 
H19A H 0.2570 0.8825 0.3763 0.061 Uiso 1 1 calc R . . 
C20 C 0.2259(2) 1.0198(2) 0.36342(13) 0.0508(8) Uani 1 1 d . . . 
H20A H 0.2760 1.0432 0.3860 0.061 Uiso 1 1 calc R . . 
H20B H 0.1796 1.0196 0.3885 0.061 Uiso 1 1 calc R . . 
C21 C 0.20399(19) 1.0809(2) 0.31006(12) 0.0438(7) Uani 1 1 d . . . 
H21A H 0.1936 1.1439 0.3233 0.053 Uiso 1 1 calc R . . 
C22 C 0.27712(18) 1.0821(2) 0.27100(12) 0.0381(7) Uani 1 1 d . . . 
H22A H 0.3278 1.1045 0.2934 0.046 Uiso 1 1 calc R . . 
H22B H 0.2639 1.1239 0.2383 0.046 Uiso 1 1 calc R . . 
C23 C 0.12397(19) 1.0443(2) 0.27571(15) 0.0505(9) Uani 1 1 d . . . 
H23A H 0.0773 1.0449 0.3005 0.061 Uiso 1 1 calc R . . 
H23B H 0.1091 1.0835 0.2420 0.061 Uiso 1 1 calc R . . 
C24 C 0.31498(18) 0.9232(2) 0.30249(12) 0.0417(7) Uani 1 1 d . . . 
H24A H 0.3264 0.8606 0.2903 0.050 Uiso 1 1 calc R . . 
H24B H 0.3656 0.9467 0.3244 0.050 Uiso 1 1 calc R . . 
O1 O 0.46081(13) 1.20058(13) 0.23358(10) 0.0515(6) Uani 1 1 d . . . 
P1 P 0.38960(4) 0.98356(5) 0.20320(3) 0.02728(16) Uani 1 1 d . . . 
Pd1 Pd 0.5000 1.07069(2) 0.2500 0.02818(9) Uani 1 2 d S . . 
 
loop_ 
 _atom_site_aniso_label 
 _atom_site_aniso_U_11 
 _atom_site_aniso_U_22 
 _atom_site_aniso_U_33 
 _atom_site_aniso_U_23 
 _atom_site_aniso_U_13 
 _atom_site_aniso_U_12 
C1 0.0351(16) 0.0315(16) 0.0356(16) -0.0016(12) 0.0027(13) 0.0031(12) 
C2 0.0313(16) 0.0302(15) 0.0466(17) 0.0007(12) 0.0061(13) -0.0001(12) 
C3 0.058(2) 0.0358(17) 0.059(2) 0.0015(15) 0.0214(17) 0.0111(15) 
C4 0.067(3) 0.058(2) 0.089(3) -0.008(2) 0.029(2) 0.0177(19) 
C5 0.0312(15) 0.0316(14) 0.0265(14) 0.0012(11) 0.0011(11) 0.0020(11) 
C6 0.0346(16) 0.0363(16) 0.0303(15) 0.0016(12) 0.0040(12) 0.0070(13) 
C7 0.0443(19) 0.0407(17) 0.0373(17) 0.0075(13) 0.0023(14) 0.0119(14) 
C8 0.053(2) 0.0430(18) 0.0388(17) 0.0116(14) 0.0072(15) 0.0049(15) 
C9 0.0365(17) 0.0480(17) 0.0400(17) 0.0082(13) 0.0114(13) 0.0028(13) 
C10 0.053(2) 0.058(2) 0.0294(16) 0.0015(13) 0.0081(14) 0.0124(15) 
C11 0.0412(17) 0.0467(18) 0.0300(16) -0.0033(13) -0.0024(13) 0.0043(14) 
C12 0.0338(16) 0.0387(16) 0.0318(16) -0.0039(12) 0.0001(12) 0.0010(12)
C13 0.0397(17) 0.061(2) 0.0323(16) 0.0070(14) -0.0019(13) 0.0112(14) 
C14 0.0310(14) 0.0371(15) 0.0388(15) 0.0048(14) 0.0059(12) 0.0035(13) 
C15 0.0280(14) 0.0311(14) 0.0286(14) -0.0023(11) 0.0017(11) 0.0019(11)
C16 0.0314(15) 0.0479(19) 0.0398(16) -0.0079(13) 0.0031(12) -0.0024(13) 
C17 0.0298(16) 0.069(2) 0.0522(19) -0.0129(17) 0.0084(14) -0.0096(15) 
C18 0.055(2) 0.056(2) 0.067(2) -0.0027(18) 0.0317(19) -0.0110(17) 
C19 0.055(2) 0.058(2) 0.0407(17) 0.0153(17) 0.0145(14) 0.0048(18) 
C20 0.050(2) 0.069(2) 0.0348(18) -0.0011(16) 0.0118(15) 0.0032(17) 
C21 0.0470(17) 0.0458(18) 0.0406(16) -0.0071(15) 0.0157(13) 0.0056(15)
C22 0.0394(16) 0.0395(17) 0.0359(15) -0.0034(13) 0.0073(12) 0.0015(14)
C23 0.0357(18) 0.067(2) 0.0494(19) -0.0019(16) 0.0097(15) 0.0110(15) 
C24 0.0415(16) 0.0457(17) 0.0388(16) 0.0079(15) 0.0083(13) 0.0084(15) 
O1 0.0538(14) 0.0342(11) 0.0637(15) 0.0034(10) -0.0112(11) 0.0052(10) 
P1 0.0253(4) 0.0292(4) 0.0271(4) -0.0005(3) 0.0009(3) 0.0012(3) 
Pd1 0.02667(17) 0.02751(16) 0.02956(17) 0.000 -0.00214(12) 0.000 
 
_geom_special_details 
; 
 All esds (except the esd in the dihedral angle between two l.s. planes) 
 are estimated using the full covariance matrix.  The cell esds are taken 
 into account individually in the estimation of esds in distances, angles 
 and torsion angles; correlations between esds in cell parameters are only 
 used when they are defined by crystal symmetry.  An approximate (isotropic) 
 treatment of cell esds is used for estimating esds involving l.s. planes. 
; 
 
loop_ 
 _geom_bond_atom_site_label_1 
 _geom_bond_atom_site_label_2 
 _geom_bond_distance 
 _geom_bond_site_symmetry_2 
 _geom_bond_publ_flag 
C25A C26A 1.3900 . ? 
C25A C30A 1.3900 . ? 
C26A C27A 1.3900 . ? 
C27A C28A 1.3900 . ? 
C28A C29A 1.3900 . ? 
C29A C30A 1.3900 . ? 
C25B C26B 1.3900 . ? 
C25B C30B 1.3900 . ? 
C26B C27B 1.3900 . ? 
C27B C28B 1.3900 . ? 
C28B C29B 1.3900 . ? 
C29B C30B 1.3900 . ? 
C1 C2 1.517(4) . ? 
C1 P1 1.862(3) . ? 
C2 C3 1.515(4) . ? 
C3 C4 1.519(5) . ? 
C5 C12 1.540(4) . ? 
C5 C6 1.545(4) . ? 
C5 C14 1.552(4) . ? 
C5 P1 1.907(3) . ? 
C6 C7 1.527(4) . ? 
C7 C8 1.520(4) . ? 
C7 C13 1.525(4) . ? 
C8 C9 1.524(4) . ? 
C9 C10 1.529(4) . ? 
C9 C14 1.532(4) . ? 
C10 C11 1.529(4) . ? 
C11 C13 1.523(4) . ? 
C11 C12 1.533(4) . ? 
C15 C16 1.540(3) . ? 
C15 C22 1.550(4) . ? 
C15 C24 1.553(4) . ? 
C15 P1 1.898(3) . ? 
C16 C17 1.535(4) . ? 
C17 C18 1.516(5) . ? 
C17 C23 1.523(4) . ? 
C18 C19 1.521(5) . ? 
C19 C20 1.521(5) . ? 
C19 C24 1.534(4) . ? 
C20 C21 1.522(4) . ? 
C21 C22 1.524(4) . ? 
C21 C23 1.528(4) . ? 
O1 O1 1.395(4) 2_655 ? 
O1 Pd1 2.0070(19) . ? 
P1 Pd1 2.3402(8) . ? 
Pd1 O1 2.0069(19) 2_655 ? 
Pd1 P1 2.3403(8) 2_655 ? 
 
loop_ 
 _geom_angle_atom_site_label_1 
 _geom_angle_atom_site_label_2 
 _geom_angle_atom_site_label_3 
 _geom_angle 
 _geom_angle_site_symmetry_1 
 _geom_angle_site_symmetry_3 
 _geom_angle_publ_flag 
C26A C25A C30A 120.0 . . ? 
C25A C26A C27A 120.0 . . ? 
C26A C27A C28A 120.0 . . ? 
C29A C28A C27A 120.0 . . ? 
C30A C29A C28A 120.0 . . ? 
C29A C30A C25A 120.0 . . ? 
C26B C25B C30B 120.0 . . ? 
C27B C26B C25B 120.0 . . ? 
C26B C27B C28B 120.0 . . ? 
C29B C28B C27B 120.0 . . ? 
C28B C29B C30B 120.0 . . ? 
C29B C30B C25B 120.0 . . ? 
C2 C1 P1 116.7(2) . . ? 
C3 C2 C1 112.6(2) . . ? 
C2 C3 C4 113.4(3) . . ? 
C12 C5 C6 108.4(2) . . ? 
C12 C5 C14 109.0(2) . . ? 
C6 C5 C14 106.7(2) . . ? 
C12 C5 P1 114.11(18) . . ? 
C6 C5 P1 111.32(18) . . ? 
C14 C5 P1 107.06(17) . . ? 
C7 C6 C5 111.0(2) . . ? 
C8 C7 C13 109.8(3) . . ? 
C8 C7 C6 109.4(2) . . ? 
C13 C7 C6 109.7(2) . . ? 
C7 C8 C9 109.2(2) . . ? 
C8 C9 C10 109.3(2) . . ? 
C8 C9 C14 109.7(2) . . ? 
C10 C9 C14 109.9(2) . . ? 
C11 C10 C9 109.3(2) . . ? 
C13 C11 C10 109.4(3) . . ? 
C13 C11 C12 109.8(2) . . ? 
C10 C11 C12 109.7(2) . . ? 
C11 C12 C5 110.4(2) . . ? 
C11 C13 C7 109.2(2) . . ? 
C9 C14 C5 110.3(2) . . ? 
C16 C15 C22 109.4(2) . . ? 
C16 C15 C24 107.9(2) . . ?
C22 C15 C24 105.5(2) . . ? 
C16 C15 P1 115.22(18) . . ? 
C22 C15 P1 110.93(18) . . ? 
C24 C15 P1 107.46(18) . . ? 
C17 C16 C15 110.6(2) . . ? 
C18 C17 C23 109.8(3) . . ? 
C18 C17 C16 110.0(3) . . ? 
C23 C17 C16 109.2(3) . . ? 
C17 C18 C19 109.4(3) . . ? 
C18 C19 C20 109.9(3) . . ? 
C18 C19 C24 109.4(3) . . ? 
C20 C19 C24 109.7(3) . . ? 
C19 C20 C21 108.6(3) . . ? 
C20 C21 C22 110.1(2) . . ? 
C20 C21 C23 109.3(3) . . ? 
C22 C21 C23 110.1(2) . . ? 
C21 C22 C15 110.8(2) . . ? 
C17 C23 C21 109.4(2) . . ? 
C19 C24 C15 111.3(2) . . ? 
O1 O1 Pd1 69.66(6) 2_655 . ? 
C1 P1 C15 101.87(12) . . ? 
C1 P1 C5 103.76(12) . . ? 
C15 P1 C5 110.12(12) . . ? 
C1 P1 Pd1 121.18(9) . . ? 
C15 P1 Pd1 111.03(8) . . ? 
C5 P1 Pd1 108.37(9) . . ? 
O1 Pd1 O1 40.67(11) 2_655 . ? 
O1 Pd1 P1 142.98(6) 2_655 . ? 
O1 Pd1 P1 102.31(6) . . ? 
O1 Pd1 P1 102.31(6) 2_655 2_655 ? 
O1 Pd1 P1 142.98(6) . 2_655 ? 
P1 Pd1 P1 114.71(4) . 2_655 ? 
 
_diffrn_measured_fraction_theta_max    0.999 
_diffrn_reflns_theta_full              26.00 
_diffrn_measured_fraction_theta_full   0.999 
_refine_diff_density_max    0.707 
_refine_diff_density_min   -0.402 
_refine_diff_density_rms    0.059 
